# Supplementary material for: Botulinum toxin A injection for post-stroke upper limb spasticity and rehabilitation practices from centers across Asian countries
Source: PubMed Central journal article supplement (PMC11034516; doi:10.3389/fneur.2024.1335365), 2024-04-08
Supplement: Data_Sheet_2.pdf [file Data_Sheet_2.pdf]

## *Supplementary Material*

### 1 Supplementary Data

**Table e1. Motor presentation at baseline**

|                                                                                                     | <b>Asian subgroup<br/>(n=51)</b> | <b>International cohort<br/>(n=456)</b> |
|-----------------------------------------------------------------------------------------------------|----------------------------------|-----------------------------------------|
| Distribution of spasticity (MAS $\geq$ 2), n (%)                                                    |                                  |                                         |
| Shoulder                                                                                            | 26 (51.0%)                       | 235 (51.5%)                             |
| Elbow                                                                                               | 41 (80.4%)                       | 335 (73.5%)                             |
| Wrist                                                                                               | 44 (86.3%)                       | 344 (75.4%)                             |
| Finger                                                                                              | 44 (86.3%)                       | 368 (80.7%)                             |
| Thumb                                                                                               | 35 (68.6%)                       | 292 (64.0%)                             |
| Soft tissue shortening (limiting $\geq$ ½ ranges), n (%)                                            |                                  |                                         |
| Shoulder                                                                                            | 11 (21.6%)                       | 156 (34.2%)                             |
| Elbow                                                                                               | 17 (33.3%)                       | 150 (32.9%)                             |
| Wrist                                                                                               | 18 (35.3%)                       | 179 (39.3%)                             |
| Hand                                                                                                | 21 (41.2%)                       | 206 (45.2%)                             |
| Motor function of the proximal upper limb (arm raising/ reaching)                                   |                                  |                                         |
| Normal: the subject is able to raise his/her arm above horizontal, normal power                     | 4 (7.8%)                         | 17 (3.7%)                               |
| Mild loss of motor function                                                                         | 15 (29.4%)                       | 111 (24.3%)                             |
| Significant loss of motor function with some useful movement                                        | 30 (58.8%)                       | 233 (51.1%)                             |
| No useful function                                                                                  | 2 (3.9%)                         | 95 (20.8%)                              |
| Motor function of the distal upper limb (hand function)                                             |                                  |                                         |
| Normal hand function                                                                                | 0                                | 1 (0.2%)                                |
| Mild impairment of hand function, difficulty with fine motor control for manipulating small objects | 5 (9.8%)                         | 40 (8.8%)                               |
| Significant loss of motor function with some useful function (grasping/ stabilizing)                | 29 (56.9%)                       | 155 (34.0%)                             |
| No useful function                                                                                  | 17 (33.3%)                       | 260 (57.0%)                             |

**Table e2. Concomitant treatments for South Asia and Global populations over one botulinum toxin cycle**

|                                | <b>Asia (n=51)</b> | <b>Global (n=456)</b> |
|--------------------------------|--------------------|-----------------------|
| <b>Physiotherapy</b>           |                    |                       |
| 1-4 sessions                   | 6 (20.0%)          | 33 (11.7%)            |
| 5-10 sessions                  | 3 (10.0%)          | 50 (17.8%)            |
| 11-20 sessions                 | 11 (36.7%)         | 74 (26.3%)            |
| > 20 sessions                  | 10 (33.3%)         | 120 (42.7%)           |
| Unknown                        | 0                  | 4 (1.4%)              |
| <b>Occupational therapy</b>    |                    |                       |
| 1-4 sessions                   | 7 (22.6%)          | 34 (18.9%)            |
| 5-10 sessions                  | 4 (12.9%)          | 33 (18.3%)            |
| 11-20 sessions                 | 13 (41.9%)         | 46 (25.6%)            |
| >20 sessions                   | 7 (22.6%)          | 63 (35.0%)            |
| Unknown                        | 0                  | 4 (2.2%)              |
| <b>Splinting</b>               | 17 (33.3%)         | 148 (32.5%)           |
| <b>Orthotics</b>               | 10 (19.6%)         | 92 (20.2%)            |
| <b>Exercise</b>                | 44 (86.3%)         | 360 (78.9%)           |
| <b>Passive stretching</b>      | 42 (82.4%)         | 410 (89.9%)           |
| <b>Electrical stimulation</b>  | 6 (11.8%)          | 58 (12.7%)            |
| <b>Positioning</b>             | 24 (47.1%)         | 237 (52.0%)           |
| <b>Anti-spastic medication</b> | 21 (41.2%)         | 130 (28.5%)           |
